# Supplementary material for: Temporal Patterns of Ant Diversity across a Mountain with Climatically Contrasting Aspects in the Tropics of Africa
Source: PubMed Central journal article supplement (PMC4361397; doi:10.1371/journal.pone.0122035), 2015-03-16
Supplement: pone.0122035.s001.pdf [file pone.0122035.s001.pdf]

| eplicate | Soil | pH    | Resist. | H <sup>+</sup> | Stone   | P Bray II | K   |
|----------|------|-------|---------|----------------|---------|-----------|-----|
| Site     | Soil | (KCl) | (Ohm)   | (cmol/kg)      | (Vol %) | mg/kg     |     |
| 8N1      | Sand | 4.2   | 14650   | 0.51           | 1       | 2         | 24  |
| 8N2      | Sand | 5.6   | 770     | 0.35           | 1       | 9         | 521 |
| 8N3      | Sand | 4.4   | 8270    | 0.71           | 1       | 7         | 52  |
| 8N4      | Sand | 4     | 12900   | 0.71           | 1       | 7         | 21  |
| 10N1     | Sand | 4.4   | 1240    | 0.76           | 1       | 18        | 68  |
| 10N2     | Sand | 3.5   | 1760    | 2.93           | 1       | 55        | 50  |
| 10N3     | Sand | 5.3   | 3120    | 0.76           | 1       | 25        | 249 |
| 10N4     | Sand | 3.9   | 15600   | 0.96           | 1       | 8         | 21  |
| 12N1     | Sand | 3.7   | 12860   | 1.36           | 1       | 6         | 21  |
| 12N2     | Sand | 3.8   | 11000   | 1.41           | 27      | 4         | 24  |
| 12N3     | Sand | 3.1   | 6800    | 6.62           | 1       | 8         | 51  |
| 12N4     | Sand | 3.6   | 7370    | 1.77           | 1       | 6         | 23  |
| 14N1     | Sand | 3.9   | 7450    | 1.57           | 8       | 11        | 26  |
| 14N2     | Sand | 3.9   | 14240   | 1.57           | 1       | 9         | 36  |
| 14N3     | Sand | 3.8   | 18240   | 1.06           | 1       | 9         | 15  |
| 14N4     | Sand | 4     | 8000    | 1.26           | 1       | 6         | 23  |
| 17N1     | Sand | 4.2   | 9050    | 2.02           | 1       | 10        | 52  |
| 17N2     | Sand | 4     | 5130    | 3.03           | 19      | 13        | 67  |
| 17N3     | Sand | 3.7   | 5050    | 4.7            | 1       | 46        | 176 |
| 17N4     | Sand | 4     | 13190   | 3.33           | 1       | 21        | 60  |
| 16S1     | Sand | 3.9   | 2650    | 5.61           | 1       | 14        | 56  |
| 16S2     | Sand | 4     | 3590    | 4.04           | 4       | 12        | 46  |
| 16S3     | Sand | 3.9   | 1440    | 5.5            | 16      | 26        | 82  |
| 16S4     | Sand | 4.1   | 8870    | 2.37           | 1       | 11        | 34  |
| 14S1     | Sand | 4.1   | 5480    | 1.41           | 4       | 12        | 47  |
| 14S2     | Sand | 4.2   | 8420    | 1.26           | 1       | 8         | 21  |
| 14S3     | Sand | 3.9   | 5970    | 1.77           | 1       | 32        | 22  |
| 14S4     | Sand | 3.9   | 5300    | 1.77           | 1       | 53        | 227 |
| 12S1     | Sand | 6     | 1130    | 0.35           | 1       | 56        | 359 |
| 12S2     | Sand | 5.1   | 1400    | 1.31           | 1       | 16        | 262 |
| 12S3     | Sand | 6.4   | 690     |                | 1       | 42        | 382 |
| 12S4     | Sand | 6.2   | 650     |                | 1       | 4         | 725 |
| 12S2.1   | Sand | 4.5   | 3170    | 0.86           | 1       | 4         | 142 |
| 12S2.2   | Sand | 4.5   | 1580    | 1.67           | 1       | 7         | 291 |
| 12S2.3   | Sand | 5.4   | 1000    | 0.86           | 1       | 5         | 196 |
| 12S2.4   | Loam | 5     | 2680    | 1.26           | 1       | 6         | 404 |
| 10S1     | Sand | 5.2   | 1260    | 0.86           | 1       | 4         | 119 |

| Orchard | Soil | pH    | Resist. | H <sup>+</sup> | Stone   | P Bray II | K   |
|---------|------|-------|---------|----------------|---------|-----------|-----|
| Site    | Soil | (KCl) | (Ohm)   | (cmol/kg)      | (Vol %) | mg/kg     |     |
| 10S2    | Loam | 5.8   | 1170    | 1.52           | 1       | 68        | 408 |
| 10S3    | Sand | 5.1   | 850     | 1.01           | 1       | 3         | 111 |
| 10S4    | Loam | 5.1   | 1400    | 0.86           | 1       | 3         | 117 |
| 9S1     | Loam | 4.8   | 970     | 1.36           | 1       | 4         | 186 |
| 9S2     | Clay | 5.1   | 820     | 0.86           | 1       | 3         | 183 |
| 9S3     | Loam | 4.5   | 2670    | 1.01           | 1       | 4         | 201 |
| 9S4     | Sand | 4.6   | 2940    | 0.96           | 1       | 3         | 269 |

| Replicate | Exchangeable cations (cmol(+)/kg) |      |      |      | C    | NO <sub>3</sub> -N | Na   | K     |
|-----------|-----------------------------------|------|------|------|------|--------------------|------|-------|
| Site      | Na                                | K    | Ca   | Mg   | %    | mg/kg              | %    | %     |
| 8N1       | 0                                 | 0.06 | 0.3  | 0.09 | 0.28 | 3.54               | 0    | 6.46  |
| 8N2       | 0.07                              | 1.33 | 3.15 | 1.76 | 1.24 | 40.4               | 1.1  | 19.98 |
| 8N3       | 0                                 | 0.13 | 0.82 | 0.35 | 0.72 | 6.26               | 0    | 6.6   |
| 8N4       | 0                                 | 0.05 | 0.3  | 0.1  | 0.48 | 3.97               | 0    | 4.73  |
| 10N1      | 0.05                              | 0.17 | 0.9  | 0.31 | 0.62 | 31.52              | 2.17 | 7.95  |
| 10N2      | 0.08                              | 0.13 | 0.39 | 0.09 | 2.34 | 34.84              | 2.2  | 3.53  |
| 10N3      | 0.09                              | 0.64 | 4.43 | 1.69 | 2.26 | 9.08               | 1.23 | 8.37  |
| 10N4      | 0.01                              | 0.05 | 0.41 | 0.06 | 0.3  | 3.85               | 0.49 | 3.58  |
| 12N1      | 0                                 | 0.05 | 0.07 | 0.01 | 0.99 | 3.51               | 0    | 3.59  |
| 12N2      | 0                                 | 0.06 | 0.06 | 0.01 | 0.94 | 3.85               | 0    | 4     |
| 12N3      | 0.03                              | 0.13 | 0.75 | 0.23 | 3.98 | 3.2                | 0.36 | 1.69  |
| 12N4      | 0                                 | 0.06 | 0.24 | 0.06 | 1.59 | 5.32               | 0    | 2.79  |
| 14N1      | 0.03                              | 0.07 | 0.06 | 0.02 | 0.95 | 5.54               | 1.58 | 3.81  |
| 14N2      | 0.02                              | 0.09 | 0    | 0.01 | 0.73 | 2.83               | 1.16 | 5.45  |
| 14N3      | 0.02                              | 0.04 | 0    | 0    | 0.88 | 3.6                | 2.22 | 3.38  |
| 14N4      | 0                                 | 0.06 | 0.41 | 0.07 | 0.5  | 5.33               | 0    | 3.22  |
| 17N1      | 0.04                              | 0.13 | 0.35 | 0.24 | 1.79 | 6.91               | 1.45 | 4.8   |
| 17N2      | 0.04                              | 0.17 | 0.16 | 0.1  | 3.44 | 9.12               | 1.27 | 4.9   |
| 17N3      | 0.07                              | 0.45 | 0.58 | 0.27 | 4.4  | 8.02               | 1.12 | 7.39  |
| 17N4      | 0.04                              | 0.15 | 0.59 | 0.08 | 3.71 | 3.72               | 1.06 | 3.64  |
| 16S1      | 0.03                              | 0.14 | 0.22 | 0.1  | 4.98 | 39.27              | 0.51 | 2.33  |
| 16S2      | 0.05                              | 0.12 | 0.66 | 0.3  | 3.6  | 18.25              | 0.99 | 2.26  |
| 16S3      | 0.11                              | 0.21 | 0.53 | 0.23 | 4.47 | 39.9               | 1.61 | 3.2   |
| 16S4      | 0.04                              | 0.09 | 0.13 | 0.03 | 1.82 | 6.98               | 1.65 | 3.28  |
| 14S1      | 0.01                              | 0.12 | 0.41 | 0.14 | 1.33 | 8.16               | 0.42 | 5.8   |
| 14S2      | 0.02                              | 0.05 | 0.15 | 0.06 | 0.71 | 6.93               | 1.06 | 3.53  |

| Replicate | Exchangeable cations (cmol(+)/kg) |      |       |      | C    | NO <sub>3</sub> -N | Na   | K     |
|-----------|-----------------------------------|------|-------|------|------|--------------------|------|-------|
| Site      | Na                                | K    | Ca    | Mg   | %    | mg/kg              | %    | %     |
| 14S3      | 0                                 | 0.06 | 0.4   | 0.24 | 1.16 | 6.84               | 0    | 2.32  |
| 14S4      | 0.03                              | 0.58 | 0.2   | 0.16 | 1.15 | 8.65               | 0.97 | 21.26 |
| 12S1      | 0.04                              | 0.92 | 11.12 | 3.11 | 2.53 | 22.73              | 0.28 | 5.9   |
| 12S2      | 0.16                              | 0.67 | 11.33 | 3.88 | 5.06 | 2.25               | 0.95 | 3.87  |
| 12S3      | 0.14                              | 0.98 | 18.51 | 4.69 | 5.11 | 78.86              | 0.56 | 4.02  |
| 12S4      | 0.11                              | 1.85 | 11.55 | 2.93 | 2.34 | 54.48              | 0.65 | 11.27 |
| 12S2.1    | 0.04                              | 0.36 | 1.9   | 0.79 | 0.69 | 11.61              | 1.02 | 9.18  |
| 12S2.2    | 0.08                              | 0.75 | 4.75  | 2.12 | 2.42 | 20.18              | 0.86 | 7.95  |
| 12S2.3    | 0.13                              | 0.5  | 13.33 | 7.43 | 5.14 | 21.43              | 0.58 | 2.26  |
| 12S2.4    | 0.12                              | 1.03 | 9.71  | 4.04 | 2.3  | 34.99              | 0.75 | 6.39  |
| 10S1      | 0.14                              | 0.3  | 8.54  | 7.56 | 3.33 | 6.71               | 0.81 | 1.75  |
| 10S2      | 0.09                              | 1.04 | 9.02  | 2.78 | 1.84 | 13.9               | 0.63 | 7.22  |
| 10S3      | 0.15                              | 0.28 | 9.11  | 5.39 | 2.31 | 21.15              | 0.97 | 1.78  |
| 10S4      | 0.1                               | 0.3  | 7.5   | 5.09 | 1.61 | 10.41              | 0.72 | 2.17  |
| 9S1       | 0.12                              | 0.48 | 10.44 | 5.82 | 2.01 | 11.26              | 0.65 | 2.61  |
| 9S2       | 0.09                              | 0.47 | 10.73 | 7.19 | 1.66 | 14.11              | 0.47 | 2.42  |
| 9S3       | 0.08                              | 0.51 | 4.5   | 2.89 | 0.25 | 4.11               | 0.86 | 5.72  |
| 9S4       | 0.06                              | 0.69 | 3.38  | 1.86 | 1.72 | 3.88               | 0.93 | 9.87  |

| Orchard | Ca    | Mg    | T-Value | Clay | Silt | Sand | Classification |
|---------|-------|-------|---------|------|------|------|----------------|
| Site    | %     | %     | cmol/kg | %    | %    | %    | Classification |
| 8N1     | 31.2  | 9.69  | 0.97    | 0.8  | 0.2  | 99   | Sa             |
| 8N2     | 47.29 | 26.38 | 6.66    | 0.6  | 0.8  | 98.6 | Sa             |
| 8N3     | 40.89 | 17.31 | 2.02    | 0.8  | 0.2  | 99   | Sa             |
| 8N4     | 25.64 | 8.49  | 1.16    | 1    | 0.4  | 98.6 | Sa             |
| 10N1    | 41.11 | 14.08 | 2.19    | 0.6  | 1.8  | 97.6 | Sa             |
| 10N2    | 10.87 | 2.48  | 3.62    | 1    | 0.4  | 98.6 | Sa             |
| 10N3    | 58.19 | 22.23 | 7.62    | 1    | 0.4  | 98.6 | Sa             |
| 10N4    | 27.56 | 4.09  | 1.49    | 1    | 0.4  | 98.6 | Sa             |
| 12N1    | 4.54  | 0.69  | 1.49    | 0.6  | 0.8  | 98.6 | Sa             |
| 12N2    | 3.97  | 0.86  | 1.55    | 0.8  | 0.2  | 99   | Sa             |
| 12N3    | 9.67  | 2.94  | 7.76    | 1    | 0.4  | 98.6 | Sa             |
| 12N4    | 11.35 | 2.97  | 2.14    | 0.6  | 0.8  | 98.6 | Sa             |
| 14N1    | 3.56  | 1.37  | 1.75    | 3.4  | 0.4  | 96.2 | Sa             |
| 14N2    | 0.12  | 0.45  | 1.69    | 3    | 2    | 95   | Sa             |
| 14N3    | 0     | 0     | 1.12    | 0.6  | 0.8  | 98.6 | Sa             |

| Orchard | Ca    | Mg    | T-Value | Clay | Silt | Sand | Classification |
|---------|-------|-------|---------|------|------|------|----------------|
| Site    | %     | %     | cmol/kg | %    | %    | %    | Classification |
| 14N4    | 22.88 | 4.08  | 1.8     | 0.4  | 1    | 98.6 | Sa             |
| 17N1    | 12.47 | 8.55  | 2.78    | 3.4  | 0.4  | 96.2 | Sa             |
| 17N2    | 4.44  | 2.74  | 3.5     | 3.4  | 0.2  | 96.4 | Sa             |
| 17N3    | 9.57  | 4.53  | 6.07    | 3.6  | 0.2  | 96.2 | Sa             |
| 17N4    | 14.03 | 2     | 4.2     | 3.4  | 1.4  | 95.2 | Sa             |
| 16S1    | 3.57  | 1.59  | 6.1     | 3.4  | 0.2  | 96.4 | Sa             |
| 16S2    | 12.75 | 5.83  | 5.17    | 3.4  | 0.2  | 96.4 | Sa             |
| 16S3    | 8.13  | 3.45  | 6.58    | 3.4  | 0.2  | 96.4 | Sa             |
| 16S4    | 4.75  | 1.17  | 2.66    | 3.4  | 0.2  | 96.4 | Sa             |
| 14S1    | 19.73 | 6.54  | 2.09    | 3.2  | 0.2  | 96.6 | Sa             |
| 14S2    | 9.86  | 3.62  | 1.54    | 3.2  | 0.2  | 96.6 | Sa             |
| 14S3    | 16.19 | 9.61  | 2.46    | 3    | 2    | 95   | Sa             |
| 14S4    | 7.24  | 5.7   | 2.73    | 3.2  | 2.2  | 94.6 | Sa             |
| 12S1    | 71.57 | 19.99 | 15.54   | 3    | 1    | 96   | Sa             |
| 12S2    | 65.3  | 22.34 | 17.35   | 3.2  | 0.2  | 96.6 | Sa             |
| 12S3    | 76.11 | 19.31 | 24.31   | 3    | 3    | 94   | Sa             |
| 12S4    | 70.24 | 17.84 | 16.45   | 1    | 6    | 93   | Sa             |
| 12S2.1  | 48.04 | 20.01 | 3.95    | 2    | 5    | 93   | Sa             |
| 12S2.2  | 50.75 | 22.61 | 9.37    | 1    | 3    | 96   | Sa             |
| 12S2.3  | 59.9  | 33.39 | 22.25   | 2    | 4    | 94   | Sa             |
| 12S2.4  | 60.05 | 25.02 | 16.16   | 0    | 9    | 91   | Sa             |
| 10S1    | 49.07 | 43.43 | 17.4    | 3    | 6.4  | 90.6 | Sa             |
| 10S2    | 62.43 | 19.2  | 14.45   | 13.2 | 8.2  | 78.6 | SaLm           |
| 10S3    | 57.11 | 33.8  | 15.96   | 9.4  | 11.8 | 78.8 | LmSa           |
| 10S4    | 54.14 | 36.77 | 13.85   | 11   | 13   | 76   | SaLm           |
| 9S1     | 57.31 | 31.96 | 18.22   | 17.2 | 9.8  | 73   | SaLm           |
| 9S2     | 55.46 | 37.2  | 19.34   | 21.4 | 9.8  | 68.8 | SaKILm         |
| 9S3     | 50.02 | 32.18 | 9       | 12   | 3.4  | 84.6 | SaLm           |
| 9S4     | 48.61 | 26.78 | 6.96    | 9.6  | 1.8  | 88.6 | LmSa           |
